# Supplementary material for: Lymph Node Colonization Dynamics after Oral Salmonella Typhimurium Infection in Mice
Source: PubMed Central journal article supplement (PMC3777876; doi:10.1371/journal.ppat.1003532), 2013-09-19

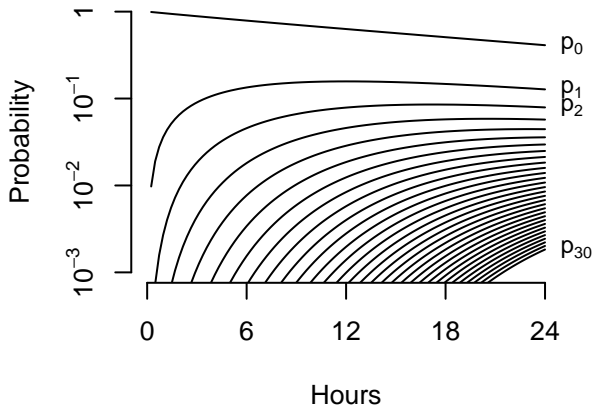

Supplement: ppat.1003532.s003.pdf [file ppat.1003532.s003.pdf]
